# Supplementary material for: Boronic acids as molecular inks for surface functionalization of polyvinyl alcohol substrates
Source: Royal Society of Chemistry journal article supplement (doi:10.1039/c8nj00992a), 2018-01-01
Supplement: c8nj00992a1.pdf [file c8nj00992a1.pdf]

Electronic Supplementary Information

**Boronic acids as molecular inks for surface functionalization of polyvinyl alcohol substrates**

Ryuhei Nishiyabu,\* Miku Tomura, Tomo Okade, and Yuji Kubo\*

Department of Applied Chemistry, Graduate School of Urban Environmental Sciences, Tokyo Metropolitan University, Minami-ohsawa, Hachioji, Tokyo 192-0397, Japan. Tel: +81-42-677-1111, Fax: +81-42-677-2821, E-mail: ryuhei@tmu.ac.jp

\*Corresponding authors: Dr. Ryuhei Nishiyabu and Prof. Dr. Yuji Kubo

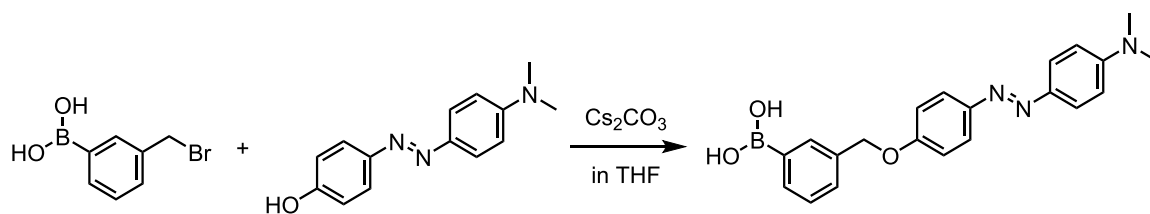

**Scheme S1** Synthetic route for a boronic acid-appended dimethylaminoazobenzene (**4**).

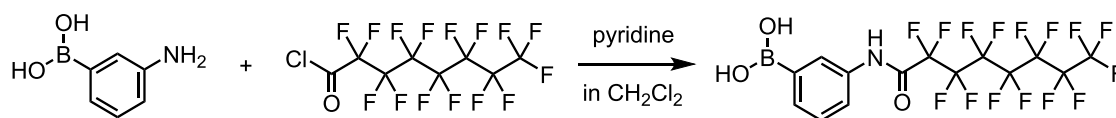

**Scheme S2** Synthetic route for a boronic acid-appended fluoroalkane (**6**).

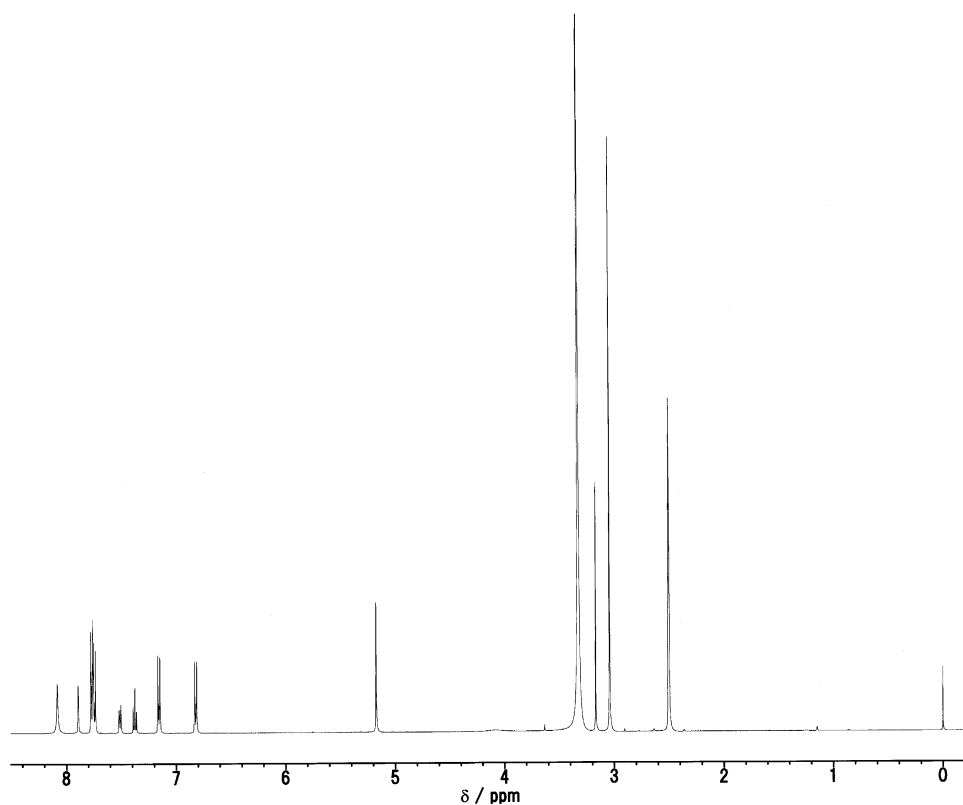

**Fig. S1**  $^1\text{H}$  NMR spectrum of **4** in  $\text{DMSO}-d_6$ .

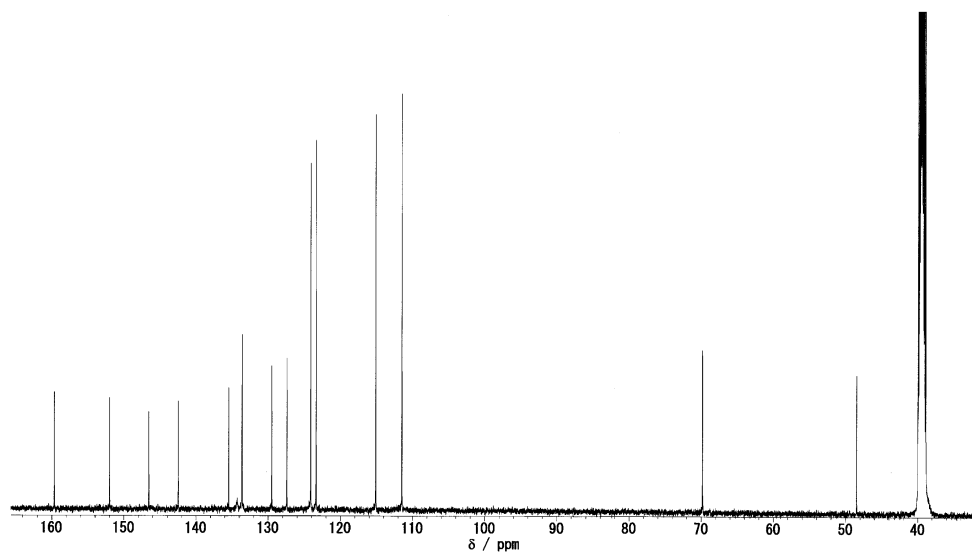

**Fig. S2**  $^{13}\text{C}$  NMR spectrum of **4** in  $\text{DMSO-}d_6$ .

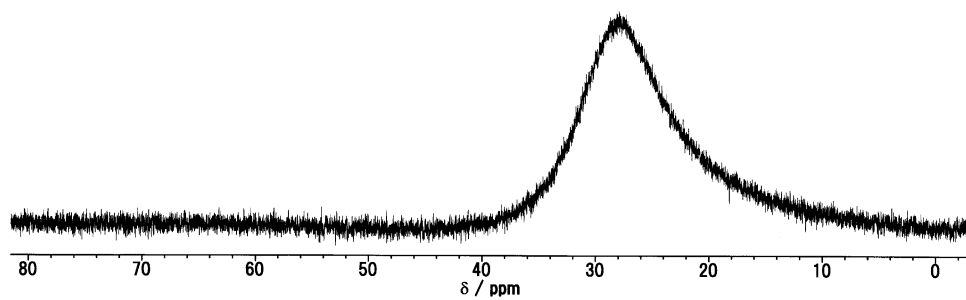

**Fig. S3**  $^{11}\text{B}$  NMR spectrum of **4** in  $\text{DMSO-}d_6$ .

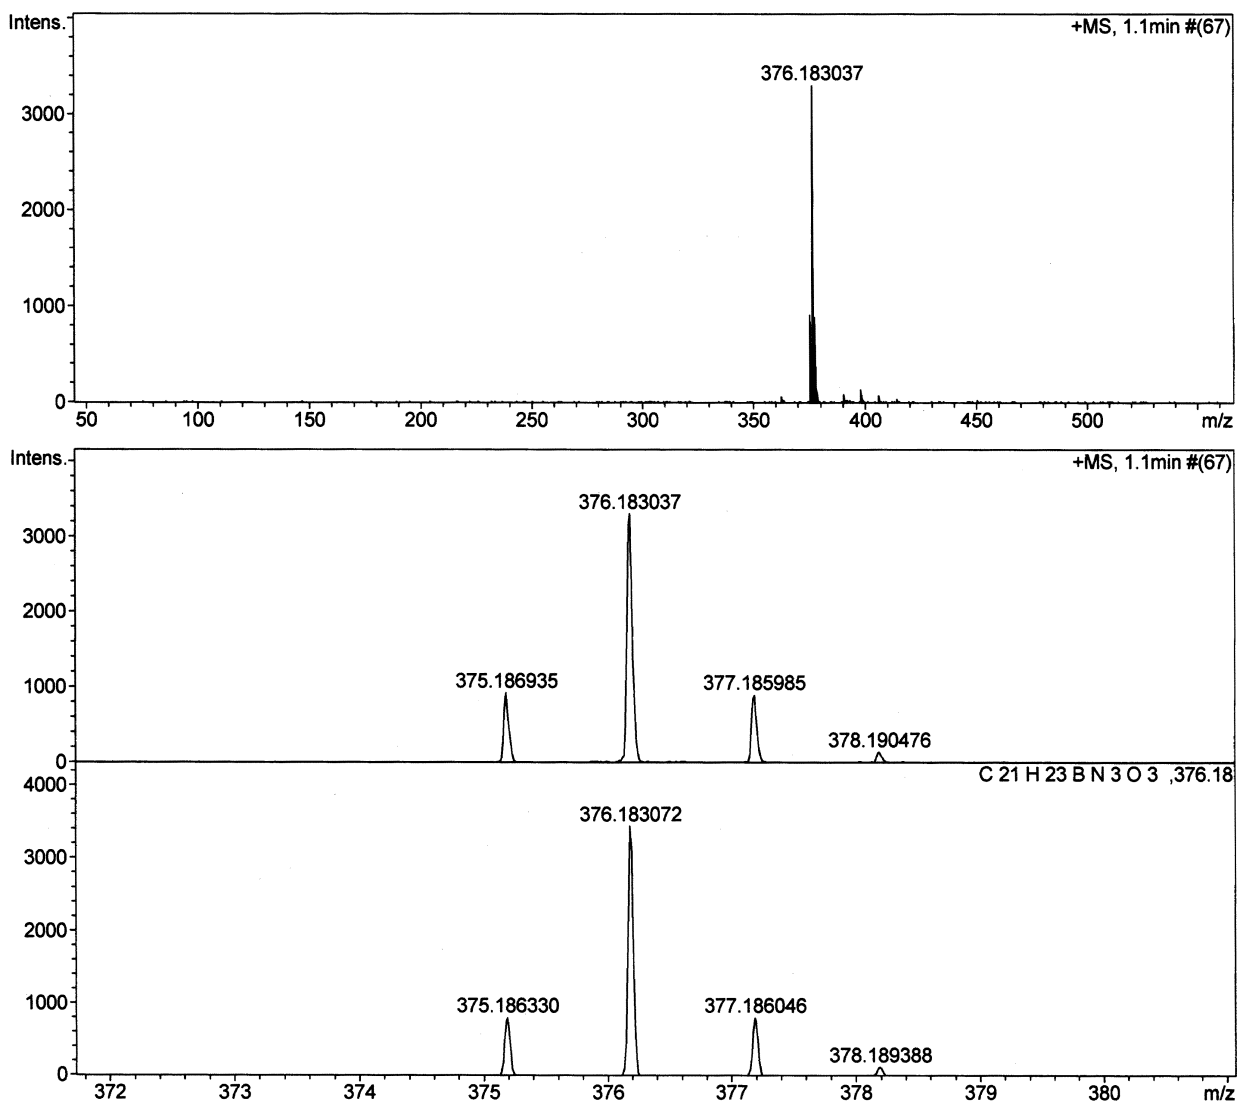

**Fig. S4** HRMS (ESI) of the isolated product (top and middle) and simulated (bottom) isotope patterns of  $[4 + H]^+$ .

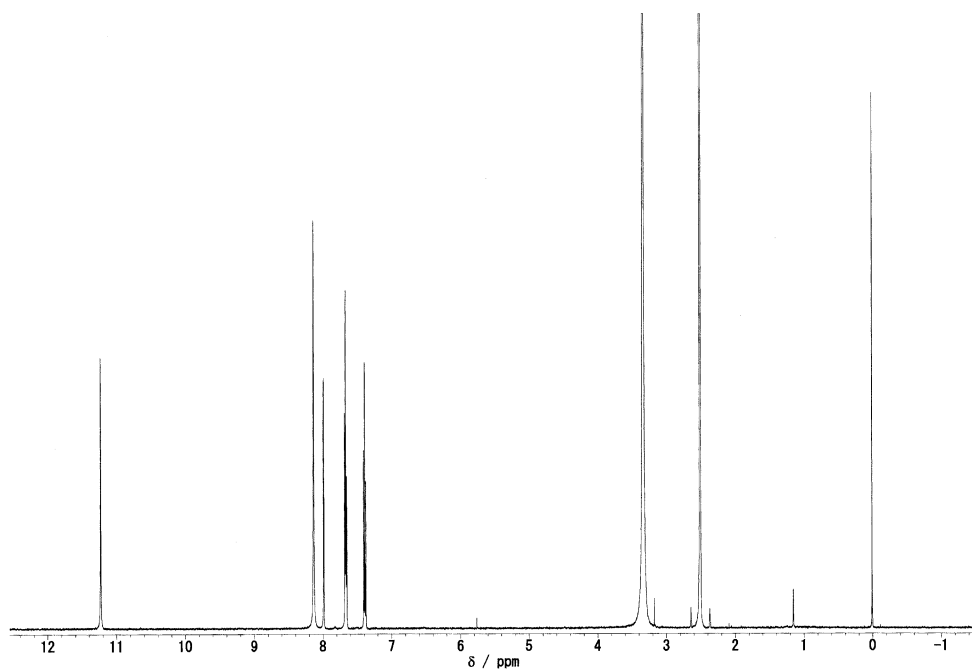

**Fig. S5**  $^1\text{H}$  NMR spectrum of **6** in  $\text{DMSO-}d_6$ .

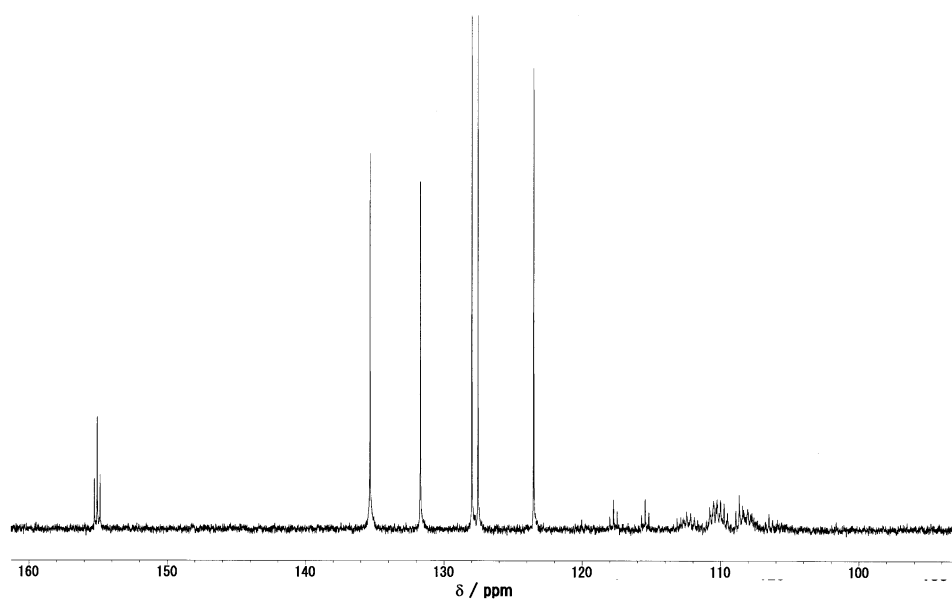

**Fig. S6**  $^{13}\text{C}$  NMR spectrum of **6** in  $\text{DMSO-}d_6$ .

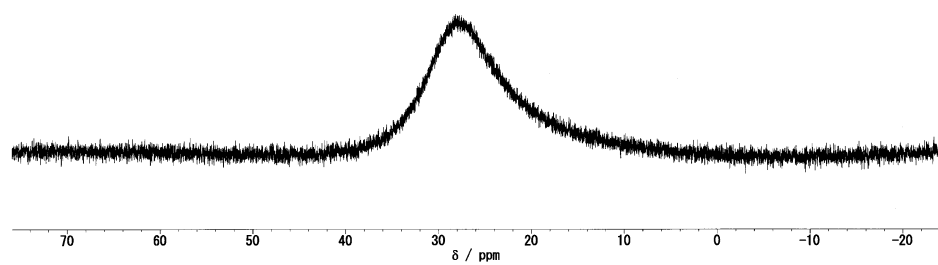

**Fig. S7**  $^{11}\text{B}$  NMR spectrum of **6** in  $\text{DMSO-}d_6$ .

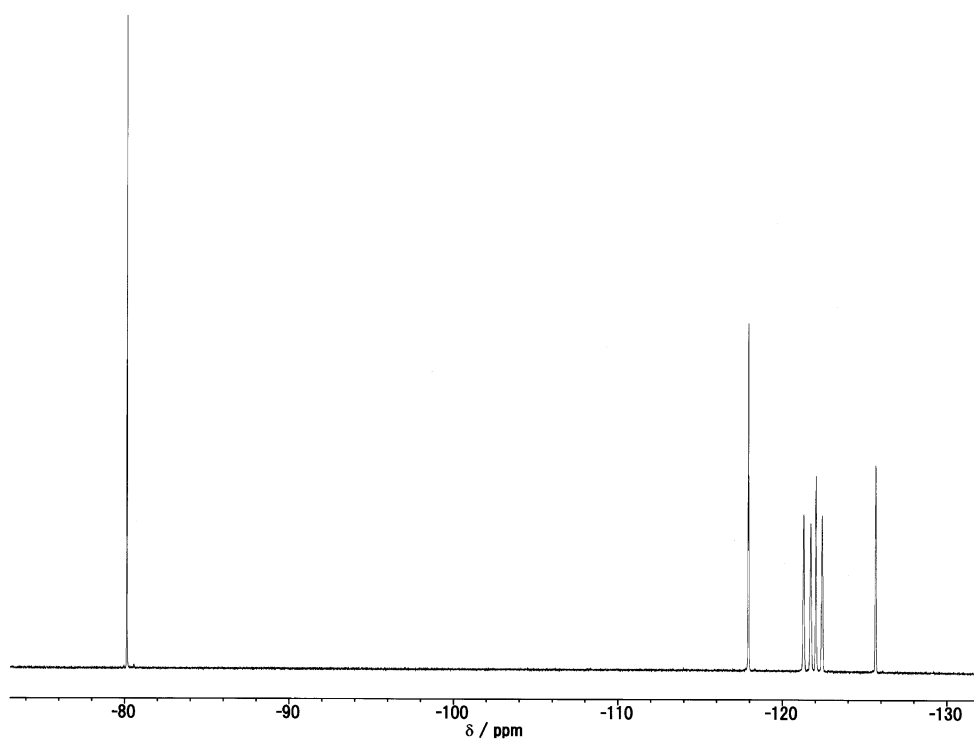

**Fig. S8**  $^{19}\text{F}$  NMR spectrum of **6** in  $\text{DMSO-}d_6$ .

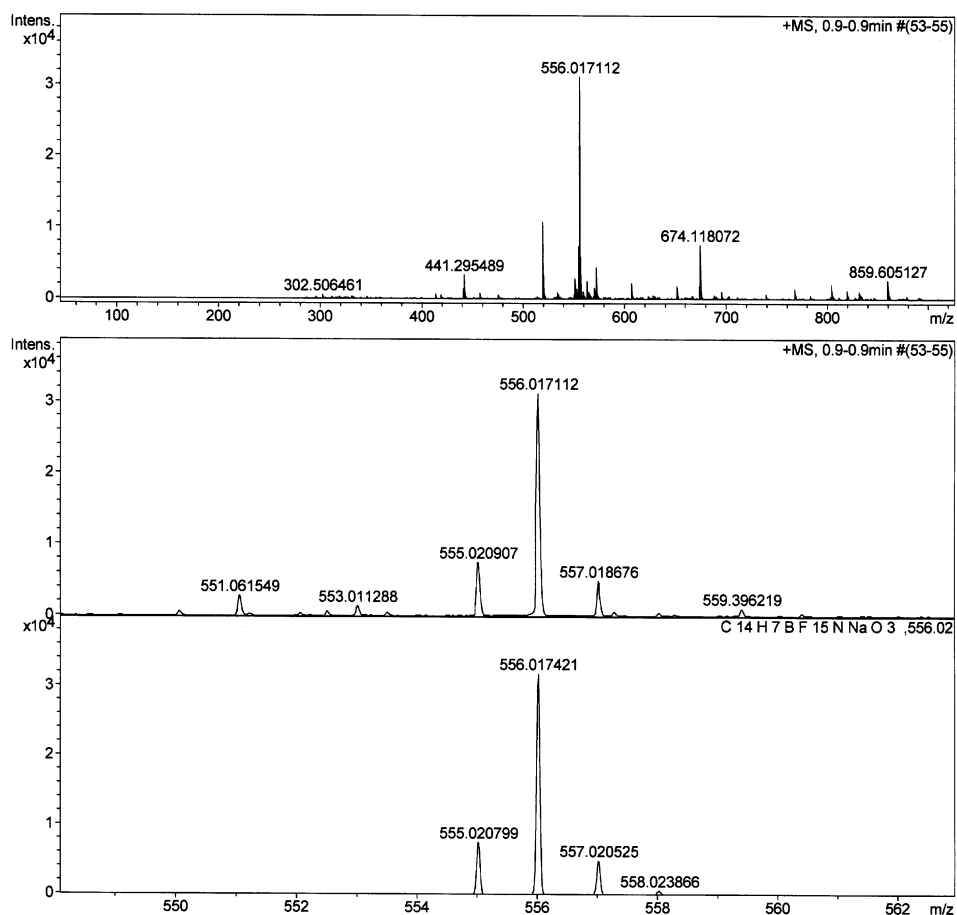

**Fig. S9** HRMS (ESI) of the product (top and middle) and simulated (bottom) isotope patterns of  $[6 + Na]^+$ .

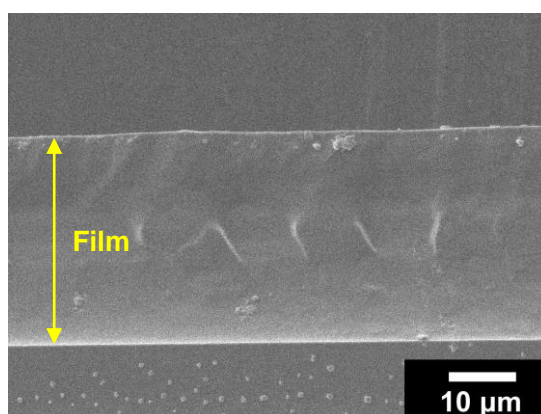

**Fig. S10** SEM image of the cross-section of the PVA film.

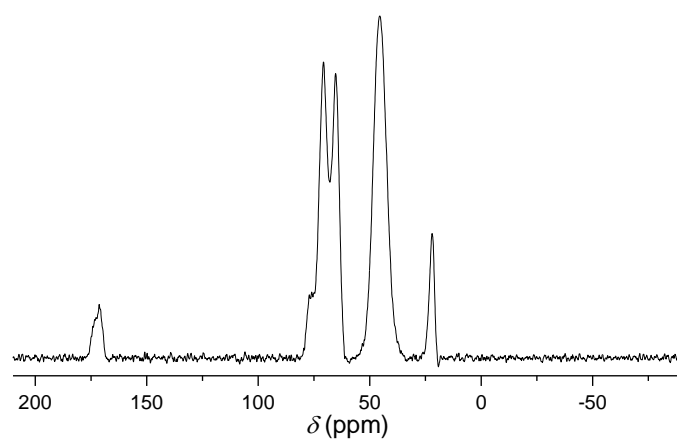

**Fig. S11** Solid state  $^{13}\text{C}$  CP/MAS NMR spectrum of the **PVA** film.

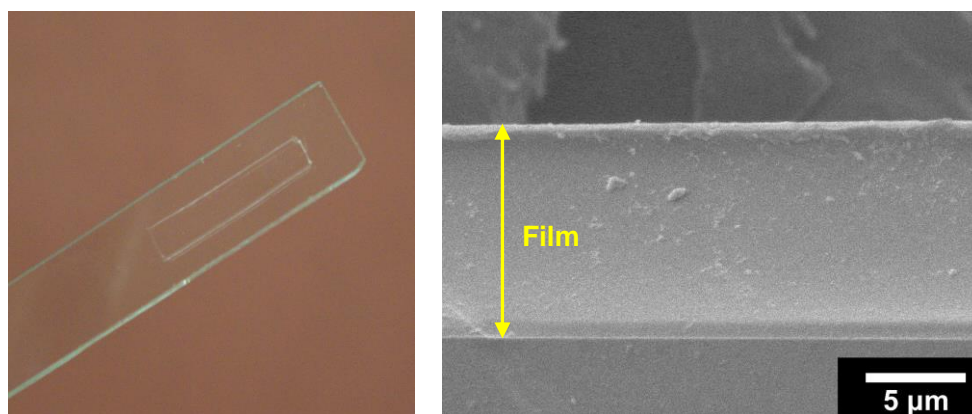

**Fig. S12** Photograph of the **PVA-GA** film on the glass slide (left) and SEM image of the cross-section of the **PVA-GA** film (right).

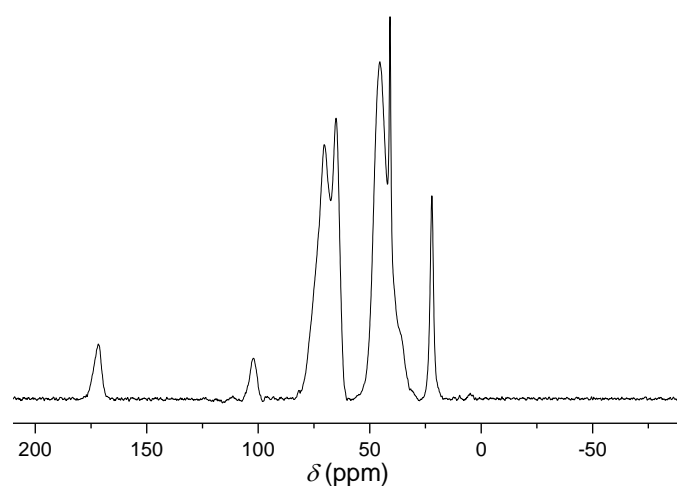

**Fig. S13** Solid state  $^{13}\text{C}$  CP/MAS NMR spectrum of a **PVA-GA** film.



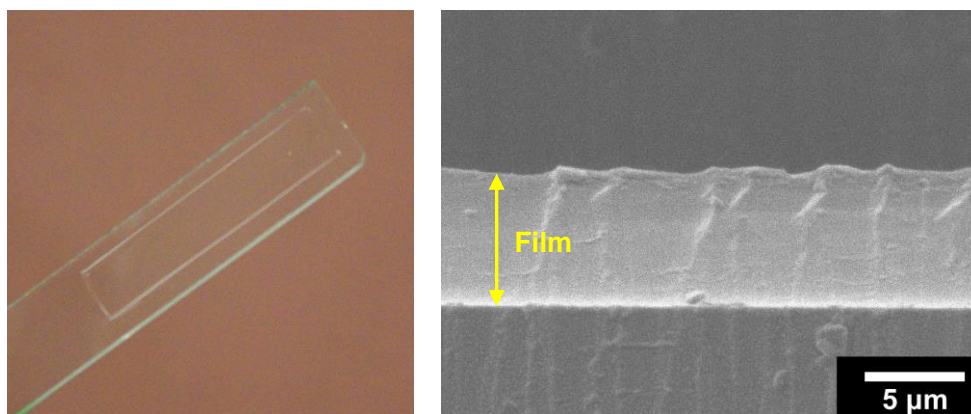

**Fig. S14** Photograph of the **PVA-BA** film on the glass slide (left) and SEM image of the cross-section of the **PVA-BA** film (right).

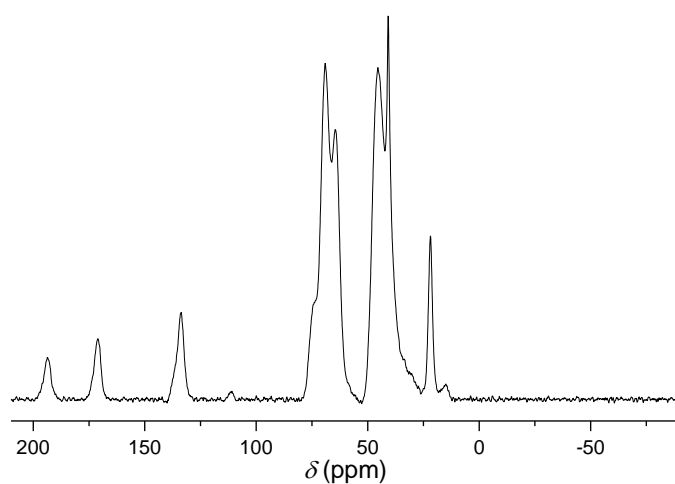

**Fig. S15** Solid state  $^{13}\text{C}$  CP/MAS NMR spectrum of the **PVA-BA** film.

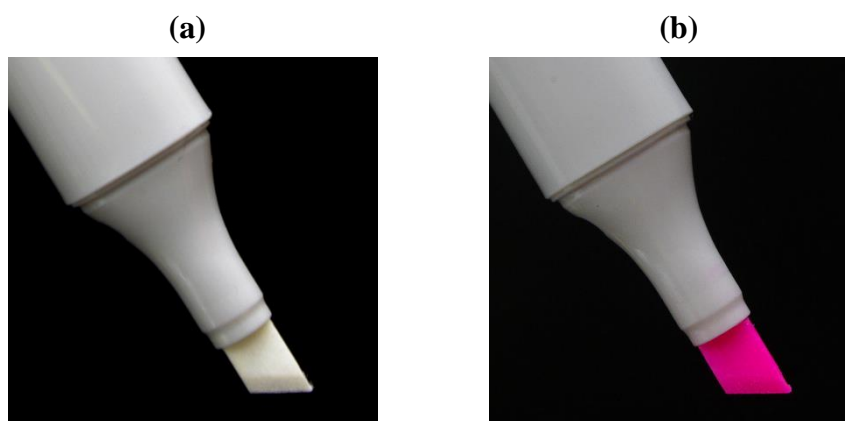

**Fig. S16** Photographs of (a) the empty marker pen and (b) the marker pen filled with methanol solution containing **1a**.

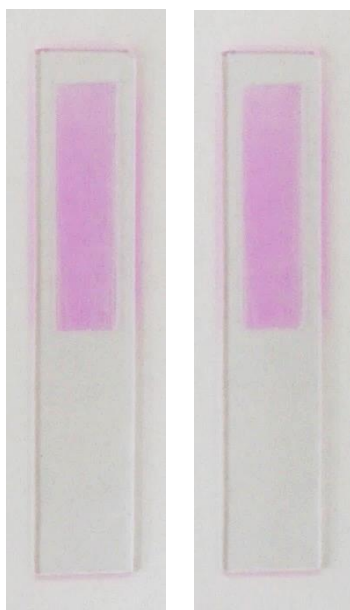

**Fig. S17** Photographs of the **1a/PVA** film on the glass slide (a) before and (b) after washing with methanol.

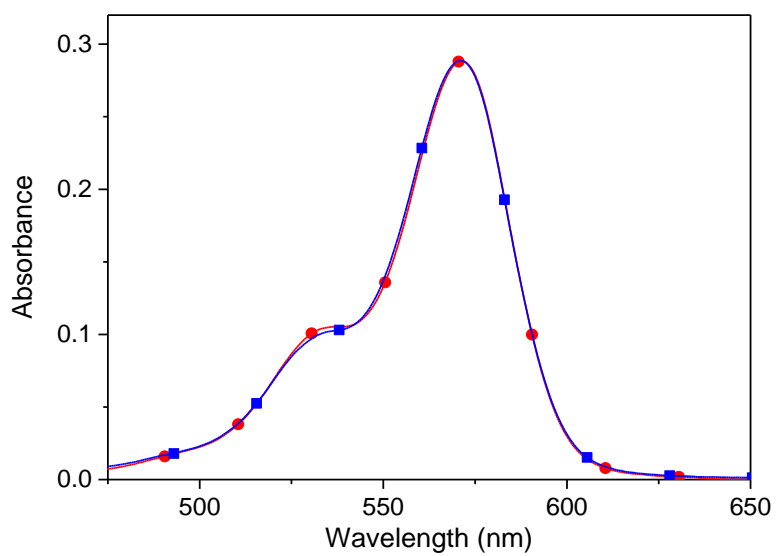

**Fig. S18** UV-vis absorption spectra of the **1a/PVA** film before (circle) and after (square) washing with methanol.

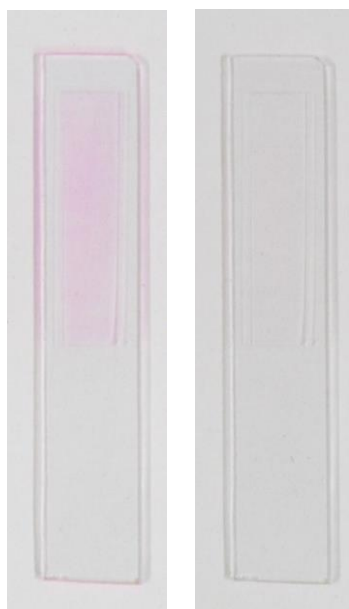

**Fig. S19** Photographs of the **1b/PVA** film on a glass slide (a) before and (b) after washing with methanol.

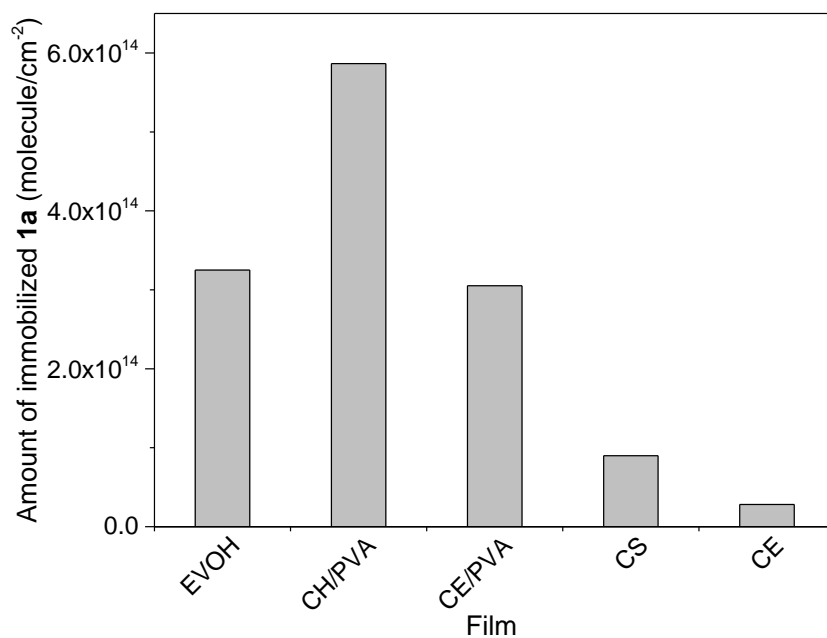

**Fig. S20** The amounts of **1a** immobilized on the surface of **EVOH**, **CH/PVA**, **CE/PVA**, **CH** and **CE** films.

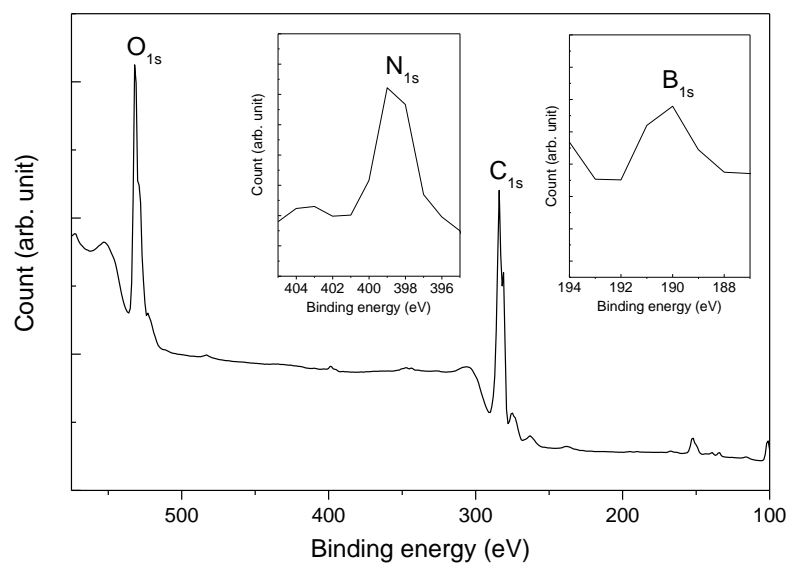

**Fig. S21** X-ray photoelectron spectrum of the **1a/PVA** film.

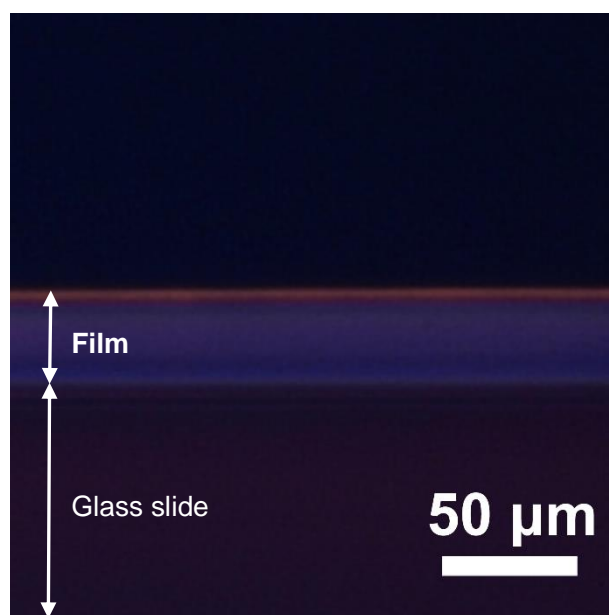

**Fig. S22** Fluorescence microscopic image of the cross-section of the **1/PVA** film.

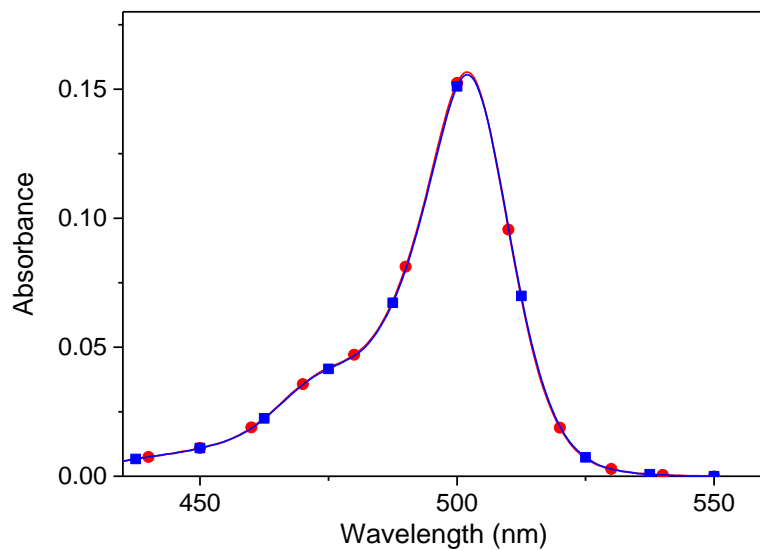

**Fig. S23** UV-vis absorption spectra of the **2/PVA** film before (circle) and after (square) washing with methanol.

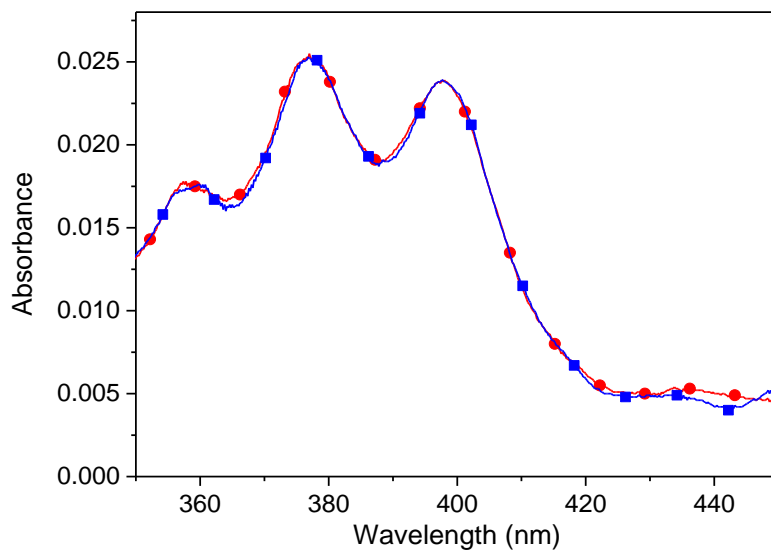

**Fig. S24** UV-vis absorption spectra of the **3/PVA** film before (circle) and after (square) washing with methanol.

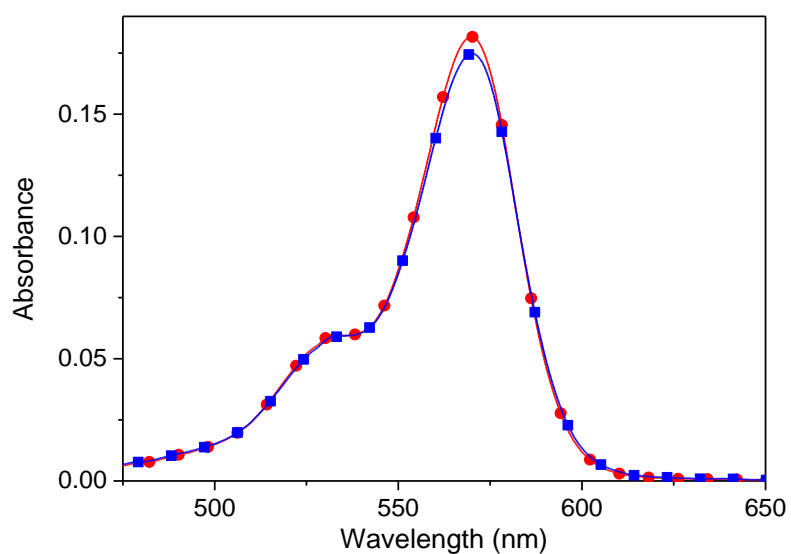

**Fig. S25** UV-vis absorption spectra of the **1a/PVA-GA** film before (circle) and after (square) washing with methanol. The amount of immobilized **1a** was determined to be  $8.1 \times 10^{14}$  molecule/cm<sup>2</sup>.

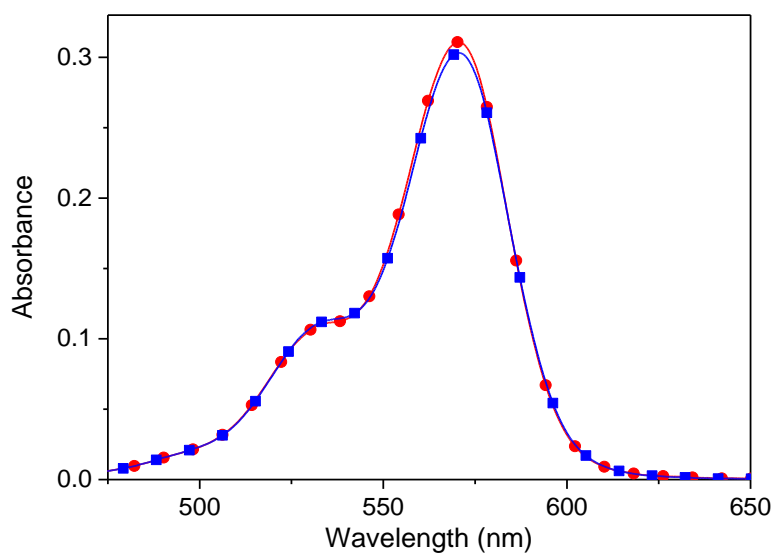

**Fig. 26** UV-vis absorption spectra of **1a/PVA-BA** film before (circle) and after (square) washing with methanol. The amount of immobilized **1a** was determined to be  $1.4 \times 10^{15}$  molecule/cm<sup>2</sup>.

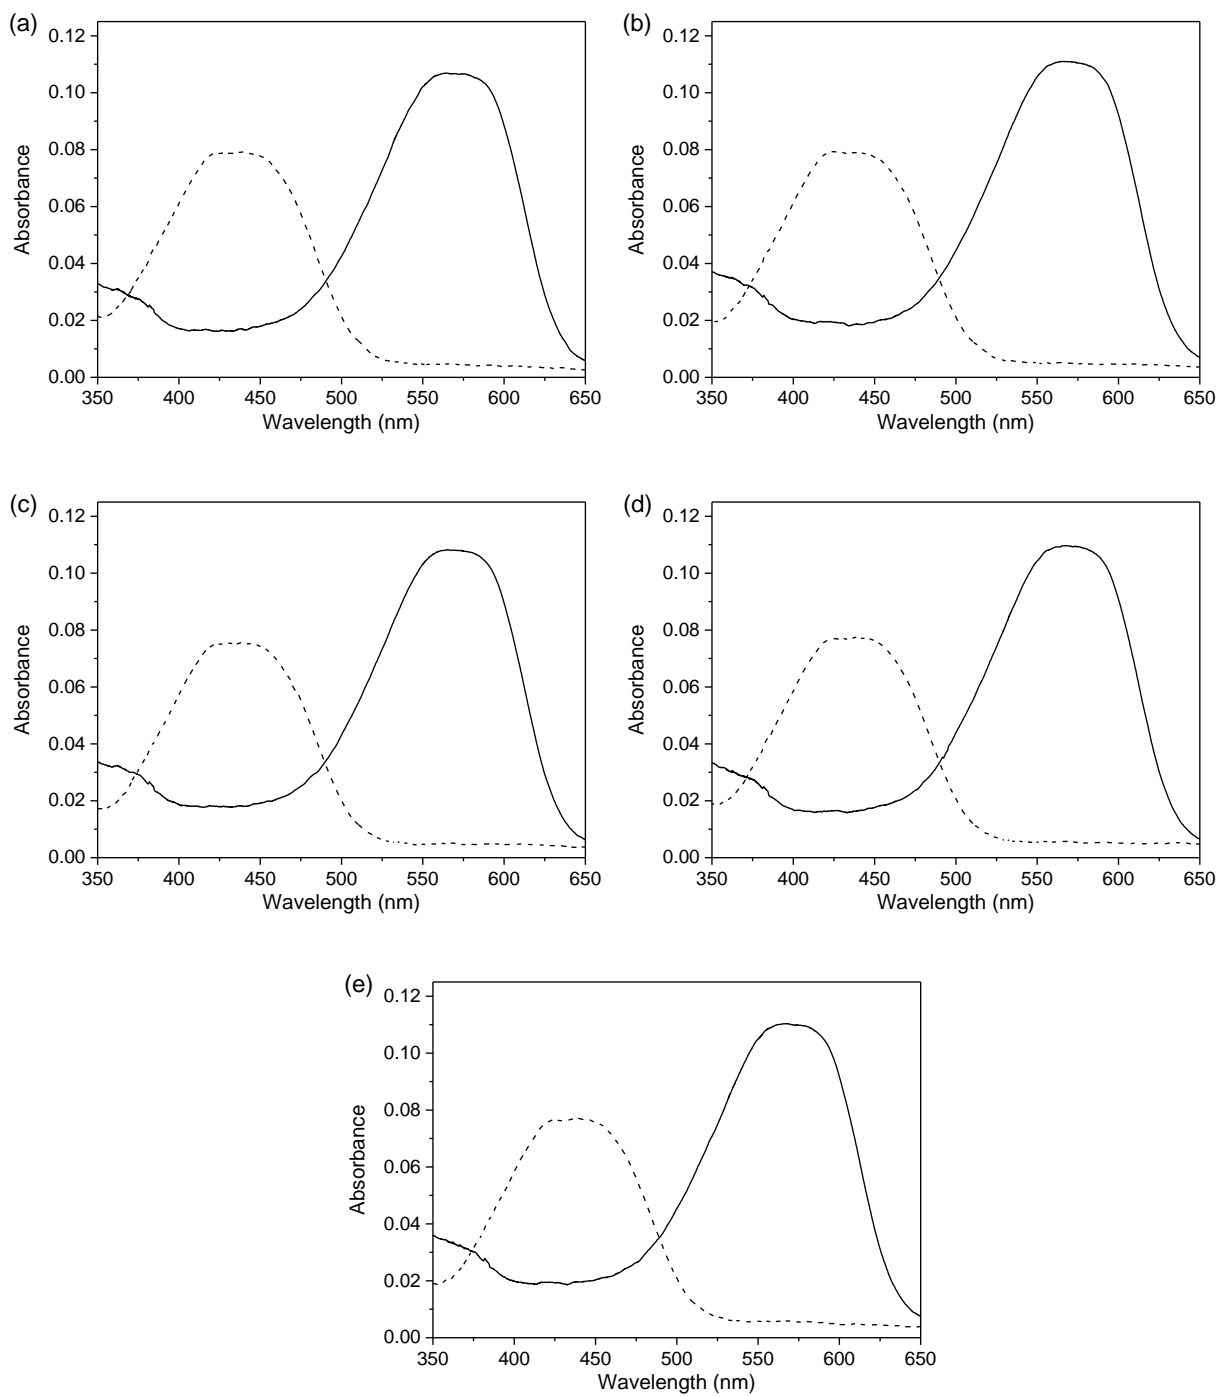

**Fig. S27** Absorption spectral changes of the 4/PVA-BA film after repetitive immersion (5 min) in acidic (solid line) and basic (dashed line) aqueous solutions. (a) First, (b) second, (c) third, (d) fourth and (e) fifth cycles.

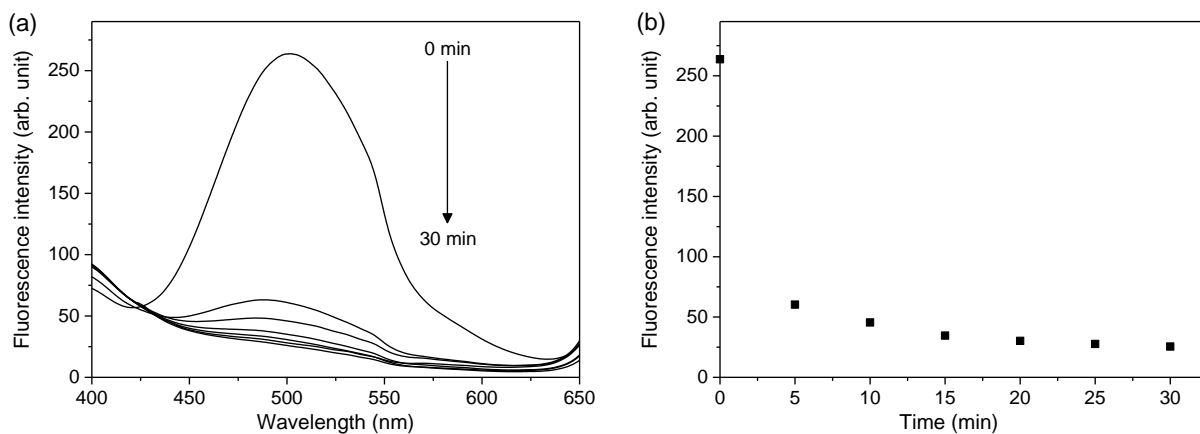

**Fig. S28** (a) Fluorescence spectra and (b) intensity ( $\lambda_{em} = 502$  nm) of the **5/PVA-BA** film at different immersion time in aqueous solution containing  $\text{Cu}^{2+}$  ions ( $2.0 \times 10^{-5}$  M). Conditions: 5 mM HEPES buffer (30 mL, pH 7.0),  $\lambda_{ex} = 340$  nm. Stock solution of copper perchlorate ( $1.0 \times 10^{-2}$  M, 60  $\mu\text{L}$ ) dissolved in distilled water were added to 5 mM HEPES buffer solutions (30 mL, pH 7.0) in the presence of the **5/PVA-BA** film.

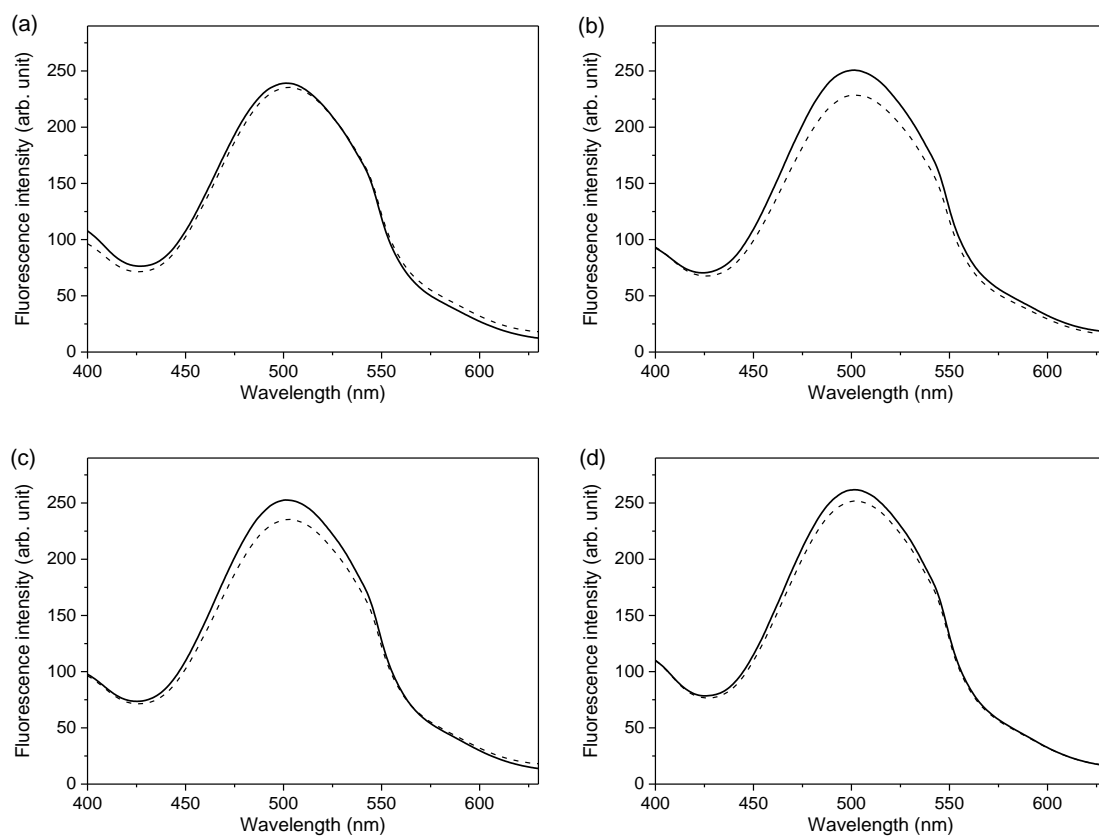



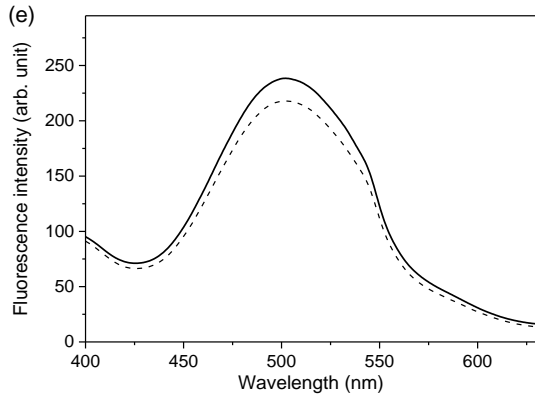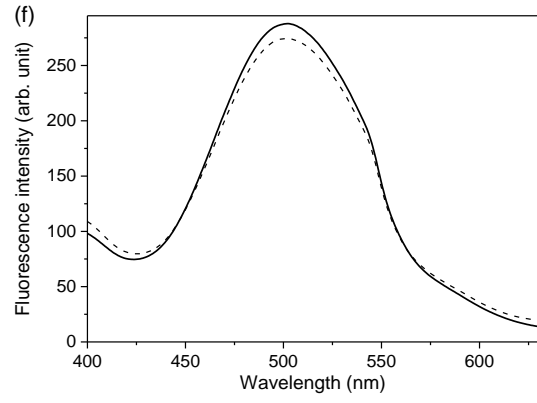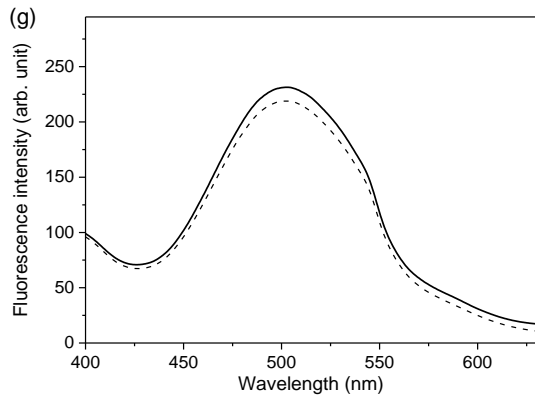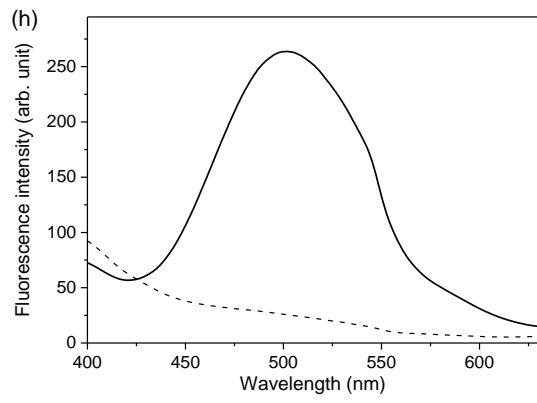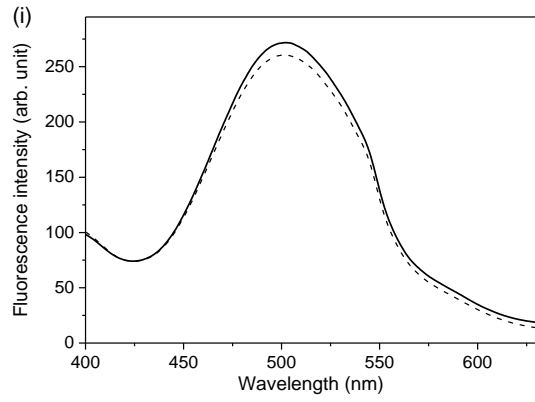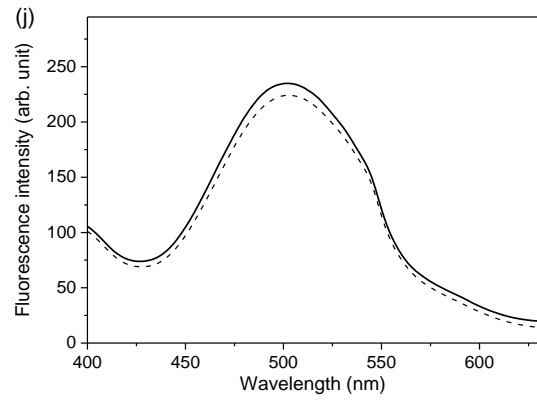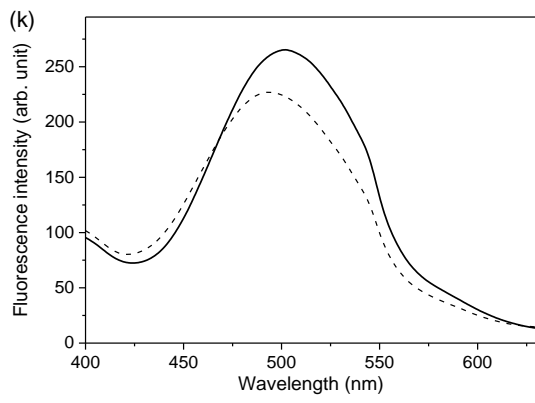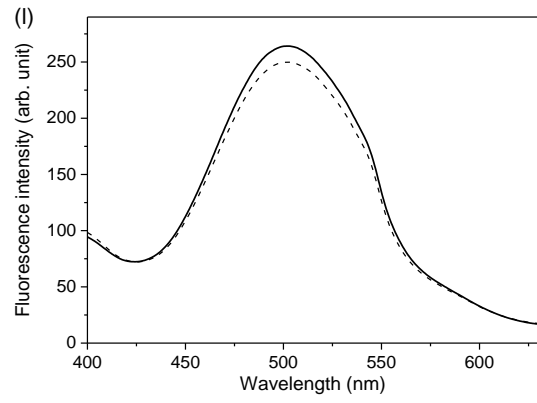

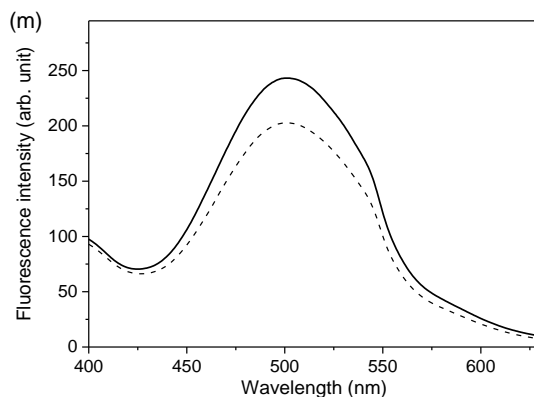

**Fig. S29** Fluorescence spectra of **5/PVA-BA** films after immersion in aqueous solution in the absence (solid line) and the presence (dashed line) of (a)  $\text{Na}^+$ , (b)  $\text{K}^+$ , (c)  $\text{Mg}^{2+}$ , (d)  $\text{Ca}^{2+}$ , (e)  $\text{Fe}^{3+}$ , (f)  $\text{Co}^{2+}$ , (g)  $\text{Ni}^{2+}$ , (h)  $\text{Cu}^{2+}$ , (i)  $\text{Zn}^{2+}$ , (j)  $\text{Cd}^{2+}$ , (k)  $\text{Hg}^{2+}$ , (l)  $\text{Al}^{3+}$ , and (m)  $\text{Pb}^{2+}$  ions. Conditions: 5 mM HEPES buffer (30 mL, pH 7.0),  $[\text{M}^{n+}] = 2.0 \times 10^{-5}$  M,  $\lambda_{\text{ex}} = 340$  nm. Solutions of metal perchlorates dissolved in distilled water ( $1.0 \times 10^{-2}$  M, 60  $\mu\text{L}$ ) were added to 5 mM HEPES buffer solutions (30 mL, pH 7.0) in the presence of the **5/PVA-BA** films.

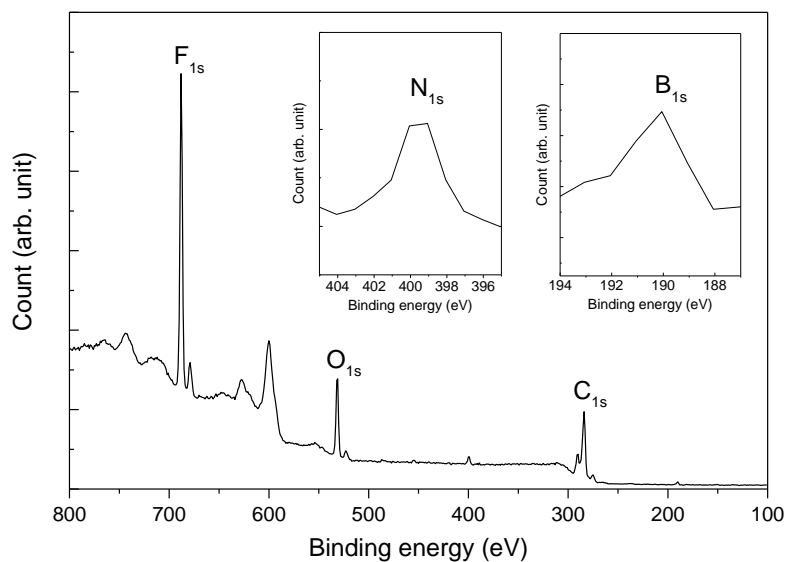

**Fig. S30** X-ray photoelectron spectrum of the **6/PVA** film.
